# Supplementary material for: Towards an Ensemble Vaccine against the Pegivirus Using Computational Modelling Approaches and Its Validation through In Silico Cloning and Immune Simulation
Source: MDPI journal article supplement (doi:10.3390/vaccines9080818), 2021-07-23
Supplement: s1 [file s1]

# Supplementary Materials

## Towards an ensemble vaccine against the Pegivirus using computational modelling approaches and its validation through *In silico* cloning and immune simulation

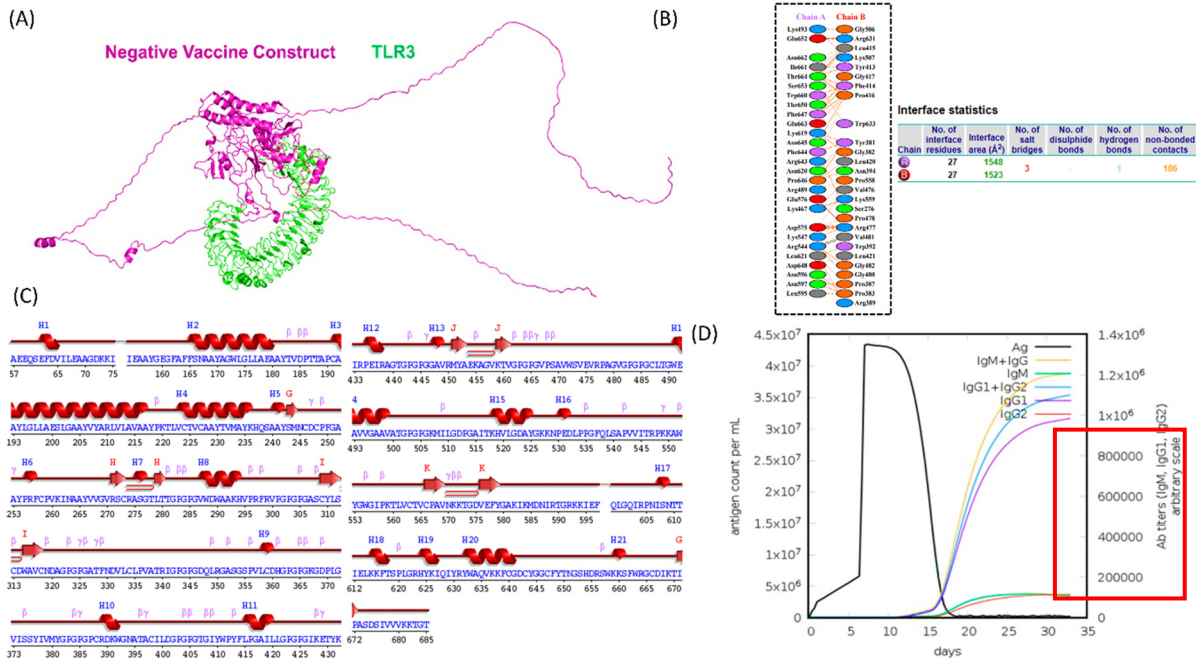

**Figure S1: Molecular Docking, secondary structure and Immune simulation results for the negative vaccine construct.** (A) show the docking results of the negative vaccine construct which reflects that though the vaccine interacts with correct binding site but most of the residues are modelled as loop region thus question the validity. (B) show the interaction pattern, (C) shows the secondary structural elements distribution while (D) display the antibodies titer production over the days.

### >Negative Control Vaccine Sequence

MAKLSTDELLEDAFKEMTLLELSDFVKKFEETFEVTAAPVAVAAAGAAPAGAAVEAAEEQSEFDVI  
LEAAGDKKIGVIVKVVREIVSGLGLKEAKDLVDGAPKPLLEKVAKEAADEAKAKLEAAGATVTVKE  
AAKCSIRSKTEGAAAYRSKTEGRIEAAAYGEGFAFFSNAAYAGWLGLLAEAAAYTVDPTTAPCAAYLGL  
LAESLGAAYVYARLVLAAYPKTLVCTVCAAYTMAYKHQSAAYSMNDCDPFGAAYPRFCPVK  
INAAAYVVGVRSCASGTLTTGPGPGVWDWAAKHVPRFRVPGPGPGASCYLSCDWAVCNDAGPG  
PGATFNDVLCLPVATRIGPGPGDQLRGASGSPVLCDHGPGPAGAVRMYAEKAGVKTGPGPGVPS  
AVWSVEVRPAGVGPGPCLTGWEAVVGAATGPGPGKMLGDPGAITKHVLGDAYGKKNPED  
LPPGFQLSAPVVITRPPKAWYGWGIPTLVCTVCPAVNKTGDFEYGAIKMDNIRTGRKKIEFV  
QLGQIRPNISNTTIELKKFTSPLGRHYKIQIYRYWAQVKKFCGDCYGGCFYTNGSHDRSWKKSFWR  
GCDIKTIPASDSIVVVKK
